# Supplementary material
Source: Springer Nature journal article supplement (https://uchicago.cottagelabs.com/records/pkjqg-cqr30/files/13065_2012_374_MOESM1_ESM.pdf)
Supplement: MOESM1 [file 13065_2012_374_MOESM1_ESM.pdf]

# Appendix: Technology

## New technology in Natural Gas

### Distributed Power Generation

#### 1) Microturbines

-Operates at hundreds of thousands of revolutions per minute at operating pressure of 60 psig (pound-force per square inch gauge)

**Capacity:** 30kW-300 kW

**Installation cost:** \$1000

**Mass production cost:** \$400-\$600

**Electrical efficiency:** 30%

#### **Advantages:**

-Compact, light, and quiet without need for liquid cooling

-low nitrogen oxide combustion

-low maintenance required, making it attractive for on-site power generation for certain residential and commercial applications

**Cost of power production:** between 1/3rd-1/7th of local electricity prices

**Companies producing these:** *Allied Signal Power Systems, Rolls Royce-Allison Mobile Power Systems...etc*

#### 2) Fuel Cells

##### **Phosphoric Acid Fuel Cells**

**Cost:** \$3000 per kilowatt

*\*cost of PAFC must be reduced to about \$1000-1500 per kW to compete with 0.05-0.06*

**per kW** hour of electricity

**Electrical efficiency:** 35%

*\*However, up to 80% thermal efficiency is possible if co-generation steam can be produced from the waste heat generated from the 200C° operation*

**Commercial Uses:** At present, total of about 170200kW PAFC units are used commercially in hospitals, nursing homes, office buildings, hotels, banks and a variety of power plants

### **Molten Carbonate Fuel Cells (MCFC)**

**Capacity:** operate at 600C° and generally targeted for modular systems of 250kW capacity

**Power production efficiency:** 50%

**Cost:** installed cost needs to be reduced to \$**1500-2000** to compete with electricity prices

*\* However advanced integrated MCFC co-generation systems could approach 70%*

**Major developers:** *Energy Research Corporation, IHI Ishikawajima-Harima Heavy Industries Company Ltd. Hitachi*

### **Solid Carbonate Fuel Cells**

This generates power electrochemically using natural gas, clean coal derived fuel gas, coal bed or coal mine methane, and landfill or waste water digestion gases. Unlike the molten one, the solid oxide concept uses zirconia ceramics, which must be operated at higher temperatures (1000C°)

**Capacity:** a unit generates 200kW electricity

**Power production efficiency:** 55%

\*However, with cogeneration it could reach 80%

**Installation cost: <\$700**

**Advantages:**

-SOFC can easily follow changing demands for electricity

-the solid state composition of SOFC allows many of the robotic mass production techniques that have reduced costs in the electronics industry to be applied to the power sector

**Disadvantage:** requires costly super alloys and exotic ceramics, gas leakage cracking and problems associated with high temperatures

### **Polymer Electrolyte Membrane Fuel Cells (PEMFC)**

With this technology, natural gas is reformed with steam and/or by partial oxidation in a fuel processor and the resulting synthesis gas is further processed to produce a hydrogen-rich gas which is fed as fuel to the PEMFC

-operates at the lowest temperature (60-80C°)

**Efficiency:** 20%

Cost of production: Need to be reduced to **\$200 per kW** (it needs to be **below 0.05 per kW hour** to be competitive)

**Advantages:**

-suitable for both stationary and propulsion applications

-PEMFC stacks with 3-5kW can target residential applications, while modular systems with 100s kW can target multi-floor apartment complexes and less than 100kW for small commercial business

**Development:** *Daimler-Chrysler, Siemens, NuPower, Mosaic Energy*

### **Innovative Natural Gas Usage**

These examples are supposed to demonstrate how flexible natural gas can be

-Harley-Davidson Motor Company uses natural gas fired regenerative thermal oxidizer to destroy the organic compounds released from painting operations

-The California Medical Center generates electricity for most of the facility from two 800kW engines. Waste heat from gas engines used to supply hot water, operate absorption chillers and sterilize medical supplies and equipment. But co-generation system isolates system from grid. Surplus power was put on the grid to generate revenue for the medical center

-Brach and Brock (fourth largest candy maker in Chicago) installed a Kathapac 1600 FV desiccant dehumidifier to deliver air at 15-35% humidity to pans of candy in order to ensure uninterrupted production of candies

### **Other developments...**

Developments at IGT (Institute of Gas Technology)

-forced internal recirculation (FIR)

-METHANE de-NO<sub>x</sub>

-Oxygen-enriched air staged natural gas combustion → this will help gas industry meet stringent air quality regulations

-MORPHYSORB (new way of 'refining' gas to pipeline quality) → reduced capital cost by 20%, operating cost 20%-60%

*Please visit their website for more information:*

<http://www.gastechnology.org/webroot/app/xn/xd.aspx?it=enweb&xd=gtihome.xml>

## Appendix: Deregulation of Natural Gas Markets

| <b>Before Mandatory Open Access</b>                                                                                                      | <b>After Restructuring</b>                                                                                                                                                                            |
|------------------------------------------------------------------------------------------------------------------------------------------|-------------------------------------------------------------------------------------------------------------------------------------------------------------------------------------------------------|
| <p><b>At Wellhead</b></p> <p>Producers contracted to sell gas to pipelines</p>                                                           | <p>Producers contract to sell gas to:</p> <ul style="list-style-type: none"> <li>-End users</li> <li>-LDC</li> <li>-Marketers, including pipeline affiliates who sell to end users and LDC</li> </ul> |
| <p>Prices regulated by FERC</p>                                                                                                          | <p>No price controls</p>                                                                                                                                                                              |
| <p>Pipeline companies aggregated supply for customers</p>                                                                                | <p>Customers aggregate supplies on contract with producers or marketers for this service</p>                                                                                                          |
| <p>Pipelines responsible for supply reliability</p>                                                                                      | <p>Customers responsible for supply reliability</p>                                                                                                                                                   |
| <p><b>Downstream</b></p>                                                                                                                 |                                                                                                                                                                                                       |
| <p>Gas customers obtained gas from pipeline companies through bundled sales and transportation service</p>                               | <p>Customers contract separately for gas from any seller and transportation from pipeline companies. Customers can buy a bundled service from marketers.</p>                                          |
| <p>Transportation typically along one path, often involving a single pipeline company. Interconnections used mainly for emergencies.</p> | <p>Customers determine the least-cost combination of transportation route and source of gas supply</p>                                                                                                |
| <p>Operational adjustments to maintain system integrity handled entirely by pipeline companies</p>                                       | <p>Customers are liable for penalties if they do not meet scheduled volumes and match receipts and deliveries within tolerances. Services available to avoid or reduce penalties</p>                  |
| <p>Pipeline companies controlled most storage for seasonal load balancing and operation control</p>                                      | <p>Customers are responsible for reserving adequate storage to meet peak day requirements</p>                                                                                                         |
| <p>Pipeline companies offered interruptible service when capacity not fully utilized</p>                                                 | <p>Firm shippers can release excess pipeline capacity and recoup part of all of reservations costs</p>                                                                                                |

<http://www.wikinest.com/image/Electricity Source Breakdown 2008.bmp>

**Appendix: Electric Generation**

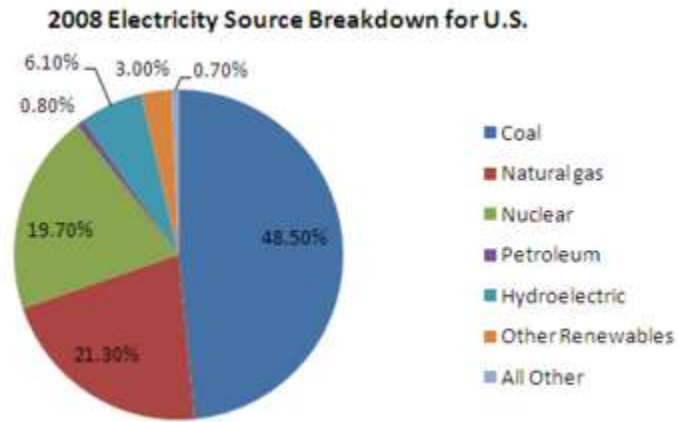

Sources: “Uses of Natural Gas”, EIA, 2008

| <b>Energy Return by Source in 2008<sup>[22]</sup></b> |                                         |
|-------------------------------------------------------|-----------------------------------------|
|                                                       | <b>Energy return on Energy Invested</b> |
| Coal-fired power plant                                | 2.5                                     |
| Nuclear power                                         | 4.5                                     |
| Hydroelectric power                                   | 10                                      |
| Wind power                                            | 35                                      |
| Natural gas                                           | 10.3                                    |

Source: Suzlon FY 07-08 Annual Report, Management Discussion and Analysis, p. 5

**Power Generation Costs for Various Energy Sources in 2008<sup>[21]</sup>**

|                | <b>Fixed Cost<br/>(cents/kWh)</b> | <b>Variable Cost<br/>(cents/kWh)</b> | <b>Total Cost<br/>(cents/kWh)</b> |
|----------------|-----------------------------------|--------------------------------------|-----------------------------------|
| Coal           | 4.1                               | 3.3                                  | 7.4                               |
| Natural<br>gas | 2.8                               | 7.8                                  | 10.6                              |
| Nuclear        | 8.0                               | 0.8                                  | 8.8                               |
| Wind           | 8.2                               | 0.0                                  | 8.2                               |

*Source: "Cost of Wind vs. Fossil Fuels, The New Energy Coalition's Energy Matters", Vol. 5, No. 2 - July 22, 2008*

**Table 14. Estimated Annualized Cost of Power with Carbon Controls**  
(2008 \$)

| Technology<br>(1)               | Developer<br>Type<br>(2) | Non-Fuel<br>O&M Cost<br>(3) | Fuel<br>Cost<br>(4) | SO <sub>2</sub> and NO <sub>x</sub><br>Allowance<br>Cost<br>(5) | CO <sub>2</sub><br>Allow.<br>Cost<br>(6) | Prod.<br>Tax<br>Credit<br>(7) | Total<br>Operating<br>Costs<br>(8) | Capital<br>Return<br>(9) | Total<br>Annualized<br>\$/Mwh<br>(10) |
|---------------------------------|--------------------------|-----------------------------|---------------------|-----------------------------------------------------------------|------------------------------------------|-------------------------------|------------------------------------|--------------------------|---------------------------------------|
| <b>Coal Technologies</b>        |                          |                             |                     |                                                                 |                                          |                               |                                    |                          |                                       |
| Coal: Pulverized                | IOU                      | \$5.57                      | \$11.13             | \$0.61                                                          | \$33.80                                  | \$0.00                        | \$51.11                            | \$49.58                  | \$100.69                              |
| Coal: Pulverized/CCS            | IOU                      | \$13.48                     | \$14.13             | \$0.77                                                          | \$4.29                                   | \$0.00                        | \$32.67                            | \$78.87                  | \$111.54                              |
| Coal: IGCC                      | IOU                      | \$5.46                      | \$10.41             | \$0.10                                                          | \$31.61                                  | \$0.00                        | \$47.58                            | \$67.02                  | \$114.60                              |
| Coal: IGCC/CCS                  | IOU                      | \$7.10                      | \$12.61             | \$0.13                                                          | \$3.83                                   | \$0.00                        | \$23.67                            | \$95.25                  | \$118.92                              |
| <b>Natural Gas Technologies</b> |                          |                             |                     |                                                                 |                                          |                               |                                    |                          |                                       |
| NG: Combined Cycle              | IPP                      | \$2.57                      | \$30.57             | \$0.14                                                          | \$13.06                                  | \$0.00                        | \$46.34                            | \$30.88                  | \$77.21                               |
| NG: Combined Cycle/CCS          | IOU                      | \$3.68                      | \$38.32             | \$0.17                                                          | \$1.64                                   | \$0.00                        | \$43.81                            | \$51.09                  | \$94.90                               |
| <b>Zero Carbon Technologies</b> |                          |                             |                     |                                                                 |                                          |                               |                                    |                          |                                       |
| Geothermal                      | IPP                      | \$13.69                     | \$0.00              | \$0.00                                                          | \$0.00                                   | \$0.00                        | \$13.69                            | \$45.54                  | \$59.23                               |
| Nuclear                         | IOU                      | \$6.13                      | \$5.29              | \$0.00                                                          | \$0.00                                   | (\$3.18)                      | \$8.23                             | \$74.99                  | \$83.22                               |
| Wind                            | IPP                      | \$6.67                      | \$0.00              | \$0.00                                                          | \$0.00                                   | \$0.00                        | \$6.67                             | \$74.07                  | \$80.74                               |
| Solar: Thermal                  | IPP                      | \$13.71                     | \$0.00              | \$0.00                                                          | \$0.00                                   | \$0.00                        | \$13.71                            | \$86.61                  | \$100.32                              |
| Solar: Photovoltaic             | IPP                      | \$4.17                      | \$0.00              | \$0.00                                                          | \$0.00                                   | \$0.00                        | \$4.17                             | \$251.24                 | \$255.41                              |

Source: CRS estimates.

Note: Projections are subject to a high degree of uncertainty. These results should be interpreted as indicative given the projection assumptions rather than as definitive estimates of future outcomes. Mwh = megawatt-hour; IGCC = integrated gasification combined cycle; NG = natural gas; CCS = carbon capture and sequestration; SO<sub>2</sub> = sulfur dioxide; NO<sub>x</sub> = nitrogen oxides; O&M = operations and maintenance; IOU = investor owned utility; IPP = independent power producer.

*Source: "CRS Report for Congress- Power Plants Characteristics and Costs", Stan Kaplan Specialist in Energy and Environmental Policy, Resources, Science, and Industry Division, November 13, 2008, Table 14*
